# Supplementary material for: Mitophagy promotes sorafenib resistance through hypoxia-inducible ATAD3A dependent Axis
Source: Springer Nature journal article supplement (doi:10.1186/s13046-020-01768-8), 2020-12-01

**a**

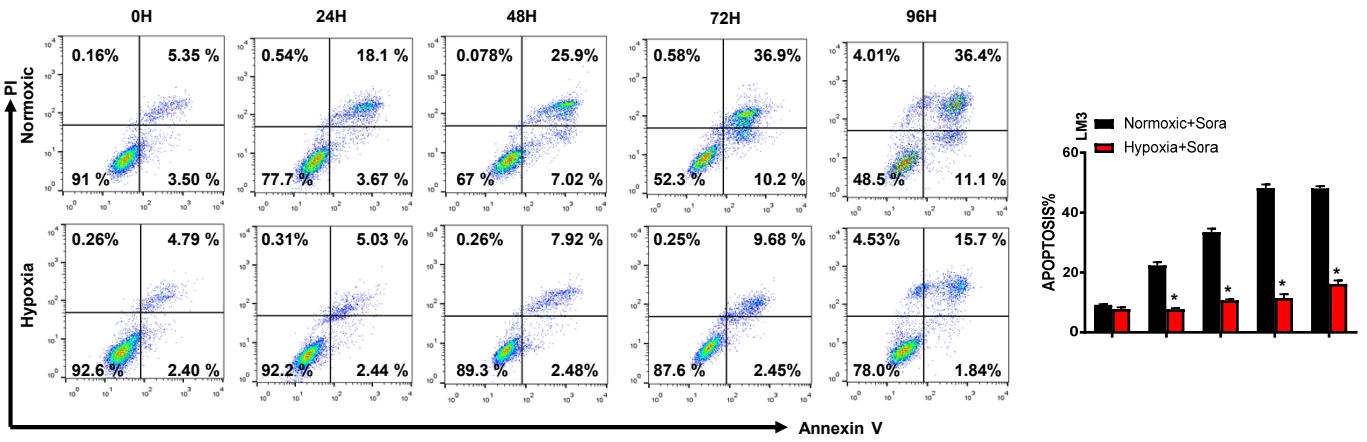

**b**

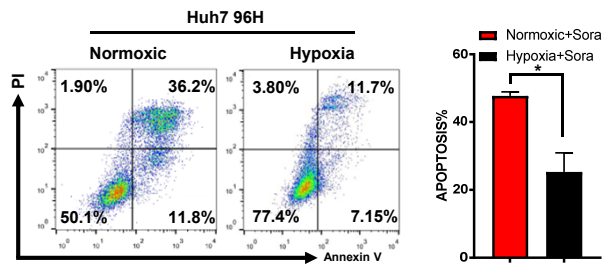

**e**

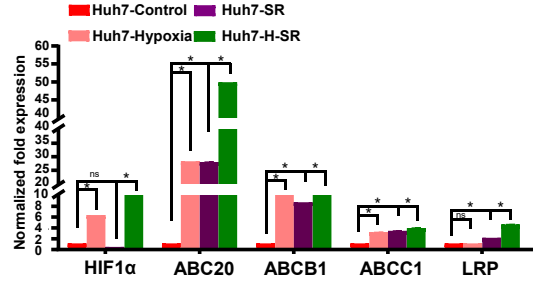

**c**

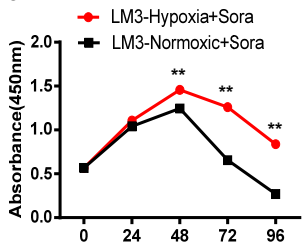

**d**

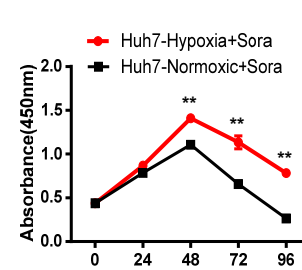

**f**

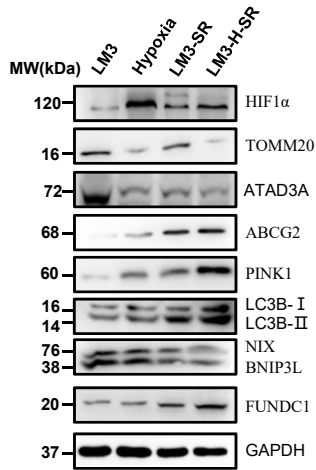

**g**

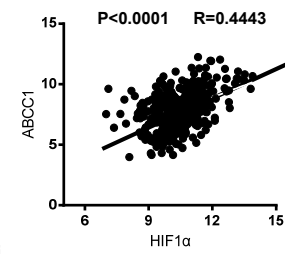

**h**

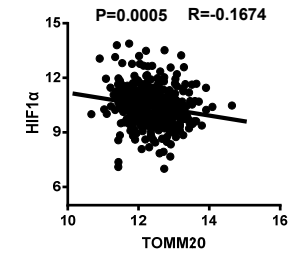

**i**

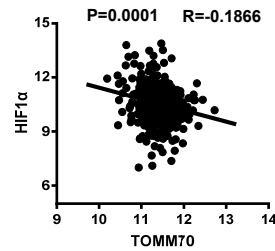

Supplement: MOESM4 [file 18663812]
