# Supplementary material for: Mitophagy promotes sorafenib resistance through hypoxia-inducible ATAD3A dependent Axis
Source: Springer Nature journal article supplement (doi:10.1186/s13046-020-01768-8), 2020-12-01

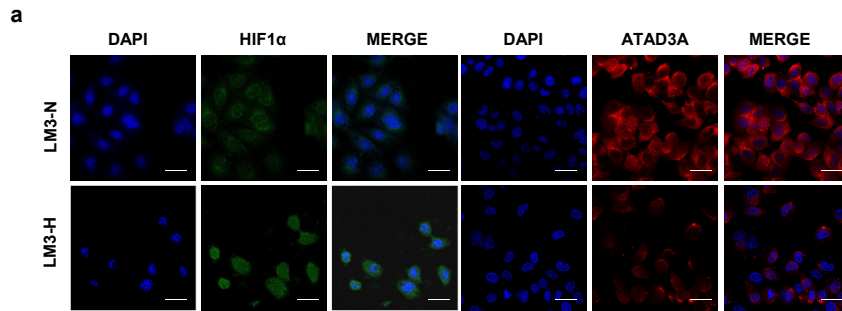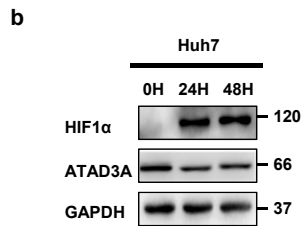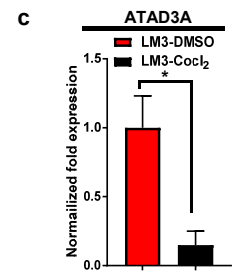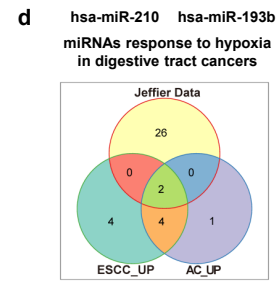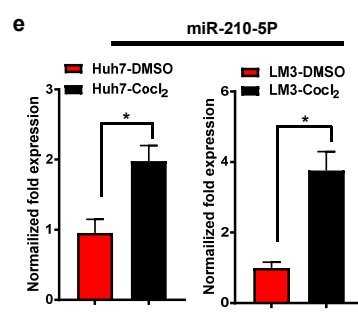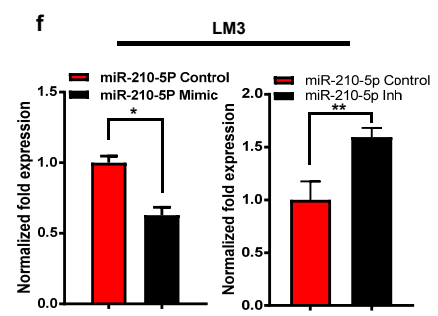

Supplement: MOESM7 [file 18663812]
